reported metastases at the time of presentation and another 2 cases reported metastatic development 96 and 121 months after diagnosis [2]. All documented metastases were intra-abdominal. Although bony metastases have been reported in ovarian granulosa cell tumour, it has never been reported in testicular granulosa cell tumour [6].

To the authors' knowledge, this is the first case of granulosa cell tumour of the testes metastasising to bone. This highlights the need to maintain a high index of suspicion for extra-abdominal metastases during the long-term follow-up in patients with previous testicular granulosa cell tumour.

## References

- 1 Al-Bozom IA, El-Faqih SR, Hassan SH, El-Tiraifi AE, Talic RF: Granulosa cell tumour of the adult type. *Arch Pathol Lab Med* 2000;124:1525–1528.
- 2 Jimenez-Quintero LP, Ro JY, Zavala-Pompa A, Amin MB, Tetu B, Ordonez NG, et al: Granulosa cell tumour of the adult testis: A clinicopathologic study of seven cases and a review of the literature. *Hum Pathol* 1993;24:1120–1126.
- 3 Steiner H, Peschel R, Janetschek G, Holtl L, Berger AP, Bartsch G, Hobisch A: Long term results of laparoscopic retroperitoneal lymph node dissection: A single-center 10-year experience. *Urology* 2004;63:550–555.
- 4 Mosharafa AA, Foster RS, Bihrl R, Koch MO, Ulbright TM, Einhorn LH, Donohue JP: Does retroperitoneal lymph node dissection have a curative role for patients with sex-cord stromal testicular tumours? *Cancer* 2004;15:98:753–757.
- 5 Gohji K, Higuchi A, Fujii A, Kizaki T: Malignant gonadal stromal tumour. *Urology* 1994;43:244–247.
- 6 Dubuc-Lissoir J, Brthiaume MJ, Boubez G, Van Nguyen T: Bone metastasis from a granulosa cell tumour of the ovary. *Gynecol Oncol* 2001;83:400–404.

## Announcement

### C.E. Alken Prize 2005

C.E. Alken Foundation Council

The C.E. Alken Foundation supports clinical and experimental research through an annual prize for outstanding scientific work.

The C.E. Alken Prize is awarded for the best unpublished scientific work in the field of urology and may be divided. The prize comprises a certificate and the sum of CHF 10,000.

Manuscripts can be submitted in either English or German. Seven copies of the manuscript should be sent to the following address and marked for the attention of:

Mr. E. Hauser, Advocate  
C.E. Alken Foundation  
Dr. F. Kellerhals & Partner  
Marktgasse 55  
CH–3011 Bern (Switzerland)

The deadline for submission of manuscripts is September 1, 2005. Each paper has to be marked with a code word and must not include the name of the author. An additional sealed envelope (marked on the outside with the code word) has to be enclosed and must contain the following:

- Curriculum vitae of the author (max. 3 pages).
- Structured summary of the manuscript (aim of study, material/methods, results, conclusions).

The award winner will be determined by the Foundation Council, whose decision is final.
